# Supplementary material for: Adhesion, stability, structural and electronic properties of perovskite/BaWO4 heterostructures: first-principles and experimental characterizations
Source: Royal Society of Chemistry journal article supplement (doi:10.1039/d4qi00231h), 2024-01-01
Supplement: d4qi00231h1.pdf [file d4qi00231h1.pdf]

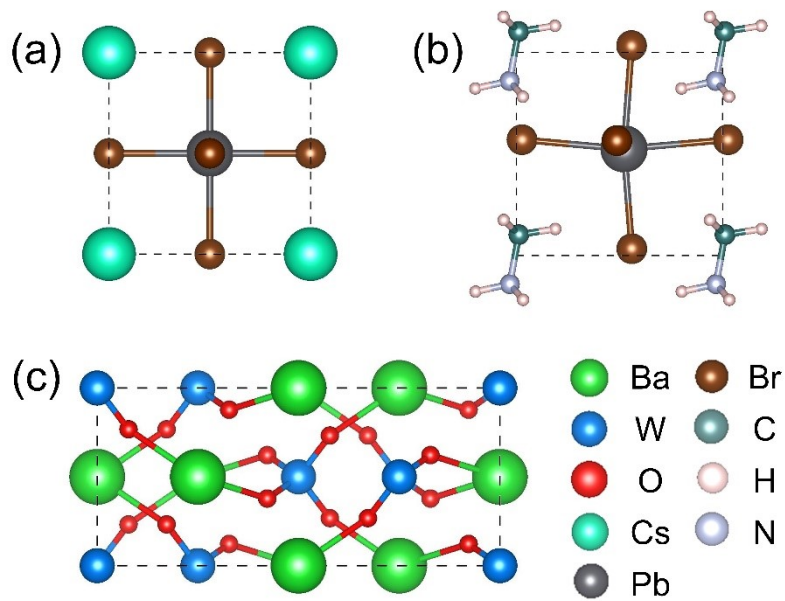

1

2 **Figure S1** Crystal structures of (a) cubic CsPbBr<sub>3</sub>, (b) monoclinic MAPbBr<sub>3</sub>, and (c)

3 tetragonal BaWO<sub>4</sub>.

4

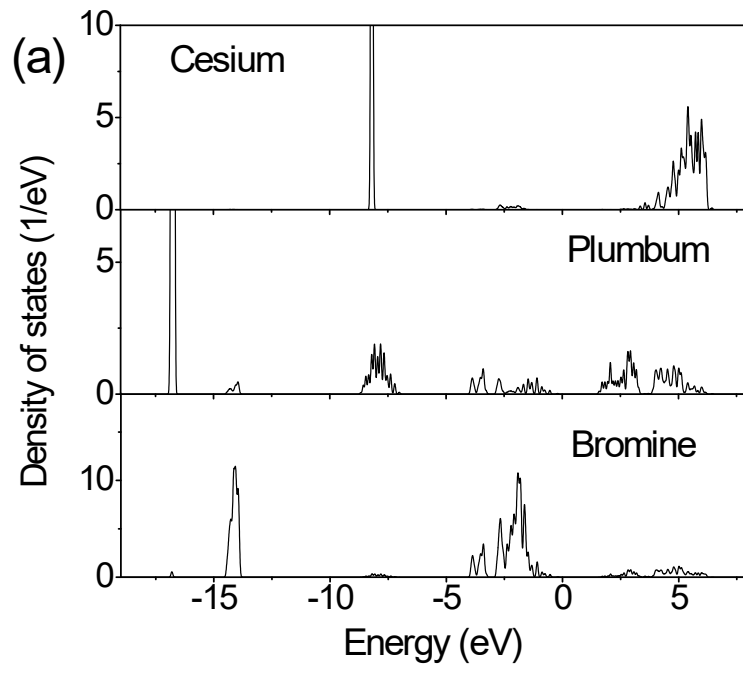

1

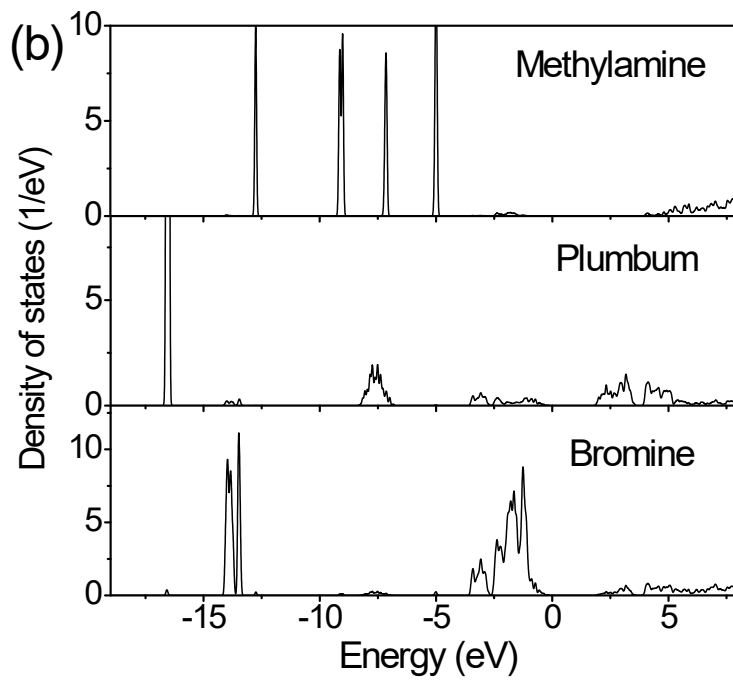

2

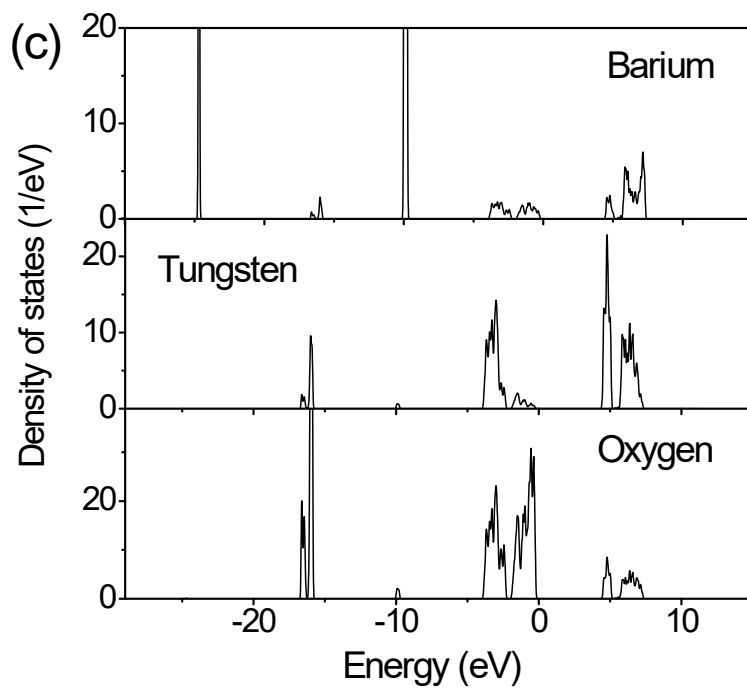

1

2 **Figure S2** DOS of (a) cubic CsPbBr<sub>3</sub>, (b) monoclinic MAPbBr<sub>3</sub>, and (c) tetragonal

3 BaWO<sub>4</sub> in bulk phase.

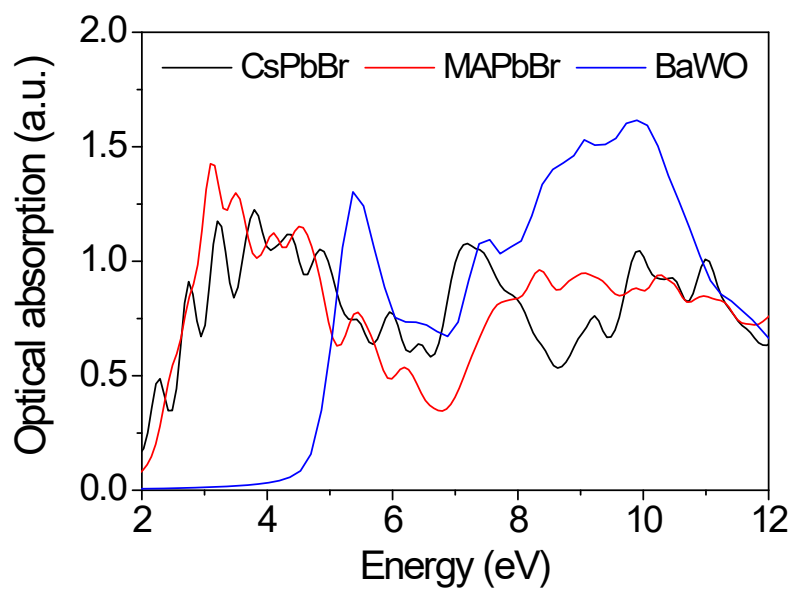

1

2 **Figure S3** Absorption coefficients of cubic CsPbBr<sub>3</sub>, monoclinic MAPbBr<sub>3</sub>, and tetragonal  
3 BaWO<sub>4</sub> in bulk phase.

4

1 **Table S1** Calculated lattice parameters (Å) of cubic CsPbBr<sub>3</sub>, monoclinic MAPbBr<sub>3</sub>, and  
2 tetragonal BaWO<sub>4</sub>.

|                     | <i>a</i> | <i>b</i> | <i>c</i> |
|---------------------|----------|----------|----------|
| CsPbBr <sub>3</sub> | 6.00     | 6.00     | 6.00     |
| MAPbBr <sub>3</sub> | 6.04     | 6.06     | 6.13     |
| BaWO <sub>4</sub>   | 5.71     | 5.71     | 12.94    |

3

4

- 1 **Table S2** Lattice parameters (Å) and mean absolute strain (%) of CsPbBr<sub>3</sub>/BaWO<sub>4</sub> and  
2 MAPbBr<sub>3</sub>/BaWO<sub>4</sub> models.

|                            | CsPbBr <sub>3</sub> /BaWO <sub>4</sub> | MAPbBr <sub>3</sub> /BaWO <sub>4</sub> |
|----------------------------|----------------------------------------|----------------------------------------|
| lattice parameter <i>a</i> | 5.85                                   | 5.88                                   |
| lattice parameter <i>b</i> | 12.45                                  | 12.59                                  |
| Mean absolute strain       | 2.08                                   | 1.89                                   |

3
